# Supplementary material for: Roadmap for the use of base editors to decipher drug mechanism of action
Source: PubMed Central journal article supplement (PMC8454938; doi:10.1371/journal.pone.0257537), 2021-09-21
Supplement: pone.0257537.s014.pdf [file pone.0257537.s014.pdf]

## Cas9

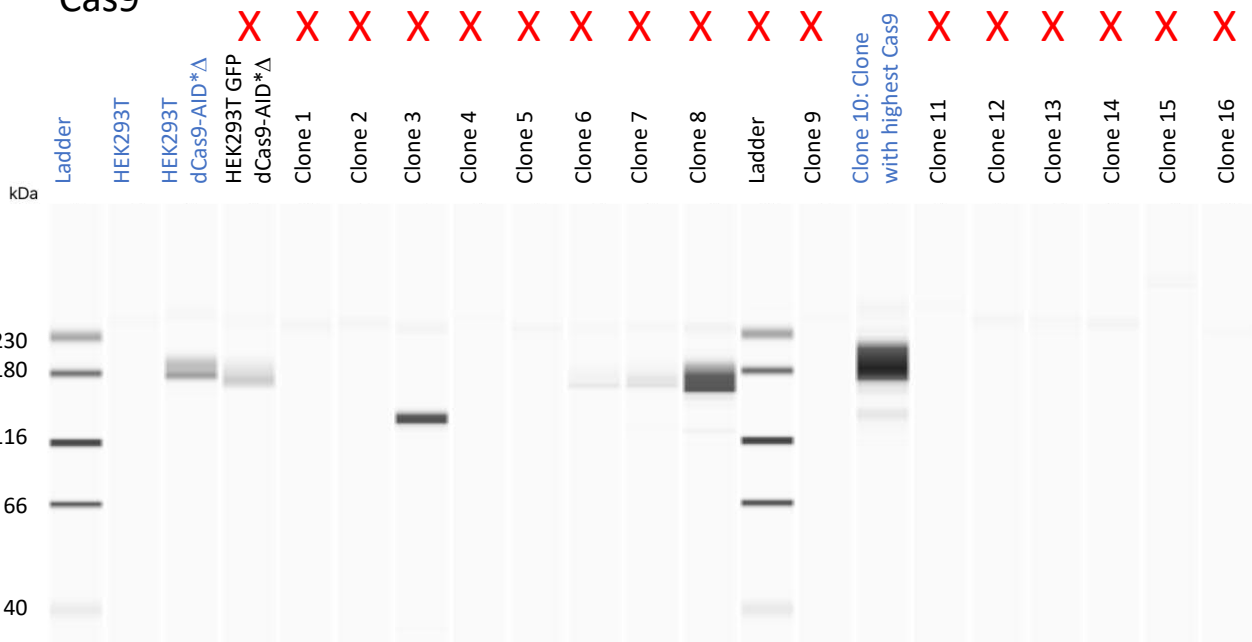

## Vinculin

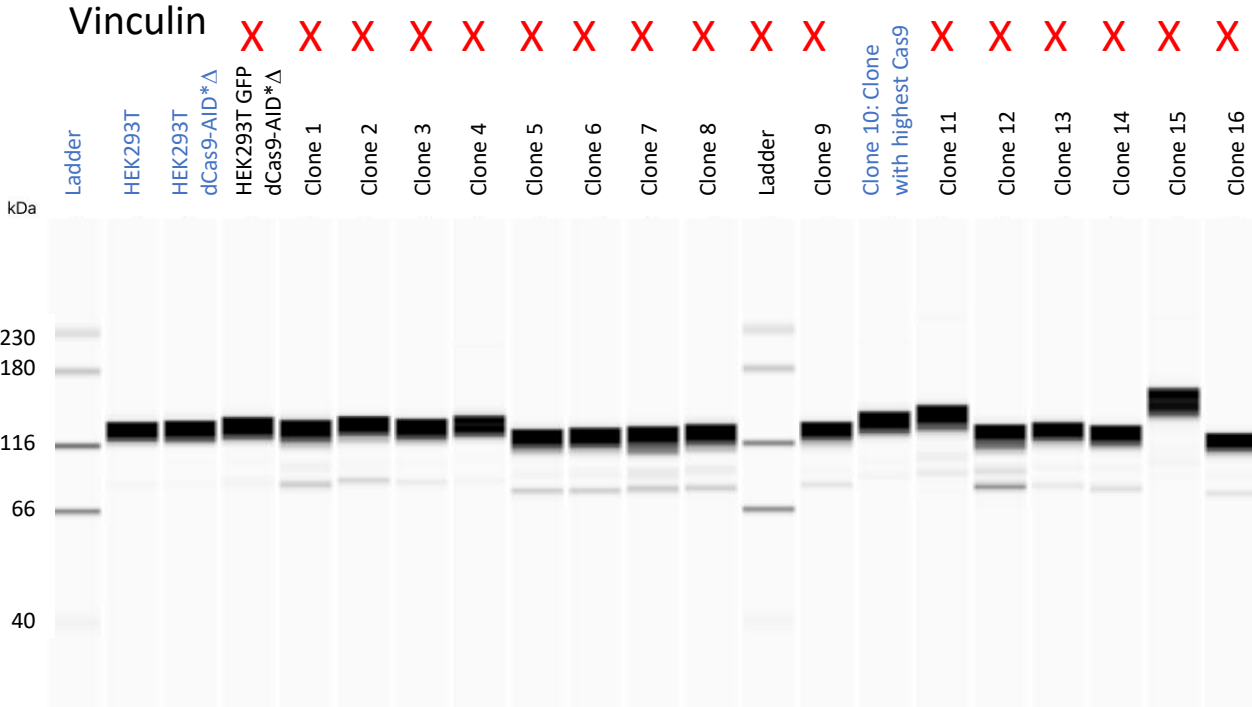

Experimental samples are indicated in blue.

Images were captured with Peggy Sue (Protein Simple).

Fig 3A and S1 Fig were generated with this blots.
